# Supplementary material for: Iron Related Biomarkers Predict Disease Severity in a Cohort of Portuguese Adult Patients during COVID-19 Acute Infection
Source: MDPI journal article supplement (doi:10.3390/v13122482), 2021-12-10
Supplement: s1 [file s1]

Table S1 – Number of individual determinations per figure or table.

|                      | COVID19 negative | COVID-19 positive | BD |
|----------------------|------------------|-------------------|----|
| Iron                 | 84               | 114               | 35 |
| Transferrin          | 84               | 114               | 35 |
| Tf sat               | 84               | 114               | 35 |
| Ferritin             | 84               | 114               | 35 |
| Hepcidin             | 89               | 96                | 35 |
| Heme                 | 142              | 85                | 35 |
| Haptoglobin          | 23               | 33                | 10 |
| Erythropoietin       | 65               | 99                | 35 |
| RBC                  | 169              | 124               |    |
| Hb                   | 169              | 124               |    |
| HCT                  | 169              | 124               |    |
| MCV                  | 169              | 124               |    |
| MCH                  | 169              | 124               |    |
| MCHC                 | 169              | 124               |    |
| RDWCV                | 169              | 124               |    |
| RDWSD                | 169              | 124               |    |
| WBC                  | 169              | 124               |    |
| Neutrophils          | 155              | 122               |    |
| Lymphocytes          | 155              | 122               |    |
| Monocytes            | 155              | 122               |    |
| platelets            | 169              | 124               |    |
| platelets MPV        | 166              | 121               |    |
| platelets PDW        | 166              | 121               |    |
|                      | Iron             |                   |    |
| severity 2           | 20               | 23                |    |
| severity 3           | 40               | 44                |    |
| severity 4           | 17               | 30                |    |
| severity 5           | 5                | 17                |    |
|                      | Transferrin      |                   |    |
| severity 2           | 20               | 23                |    |
| severity 3           | 40               | 44                |    |
| severity 4           | 17               | 30                |    |
| severity 5           | 5                | 17                |    |
| Figure 1 and table 1 |                  |                   |    |
|                      | Ferritin         |                   |    |
| severity 2           | 20               | 23                |    |
| severity 3           | 40               | 44                |    |
| severity 4           | 17               | 30                |    |
| severity 5           | 5                | 17                |    |
|                      | WBC              |                   |    |
| severity 2           | 39               | 27                |    |
| severity 3           | 67               | 47                |    |
| severity 4           | 43               | 32                |    |
| severity 5           | 6                | 18                |    |
|                      | Lymphocytes      |                   |    |
| severity 2           | 39               | 26                |    |
| severity 3           | 62               | 47                |    |
| severity 4           | 38               | 32                |    |

Figures 2  
and 3

Table S2– Distribution of COVID-19 patients among the severity groups, according to the presence of different comorbidities.

| Severity groups                                    | 2    | 3    | 4    | 5    | Total |
|----------------------------------------------------|------|------|------|------|-------|
| Count                                              | 28   | 48   | 32   | 19   | 127   |
| Percentage in each group                           | 22.0 | 37.8 | 25.2 | 15.0 | 100   |
| <b>Diabetes</b>                                    |      |      |      |      |       |
| Count                                              | 7    | 20   | 13   | 12   | 52    |
| Percentage in each group                           | 13.5 | 38.5 | 25   | 23.1 | 100   |
| Percentage within each severity group              | 25.0 | 41.2 | 40.1 | 63.2 |       |
| <b>Severity groups</b><br>$\chi^2=6.883$ , p=0.077 |      |      |      |      |       |
| <b>Hypertension</b>                                |      |      |      |      |       |
| Count                                              | 12   | 34   | 21   | 16   | 83    |
| Percentage in each group                           | 14.5 | 41.0 | 25.3 | 19.3 | 100   |
| Percentage within each severity group              | 42.9 | 70.8 | 65.6 | 84.2 |       |
| $\chi^2=9.880$ , p=0.020                           |      |      |      |      |       |
| <b>Obesity</b>                                     |      |      |      |      |       |
| Count                                              | 4    | 17   | 8    | 2    | 31    |
| Percentage in each group                           | 12.9 | 54.8 | 25.8 | 6.5  | 100   |
| Percentage within each severity group              | 14.3 | 35.4 | 25.0 | 10.5 |       |
| $\chi^2=6.698$ , p=0.082                           |      |      |      |      |       |
| <b>Dyslipidaemia</b>                               |      |      |      |      |       |
| Count                                              | 7    | 21   | 15   | 13   | 56    |
| Percentage in each group                           | 12.5 | 37.5 | 26.8 | 23.2 | 100   |
| Percentage within each severity group              | 25.0 | 43.4 | 46.9 | 13.0 |       |
| $\chi^2=8.805$ , p=0.032                           |      |      |      |      |       |
| <b>CKD</b>                                         |      |      |      |      |       |
| Count                                              | 0    | 10   | 4    | 4    | 18    |
| Percentage in each group                           | 0    | 55.6 | 22.2 | 22.2 | 100   |
| Percentage within each severity group              | 0    | 20.8 | 12.5 | 21.1 |       |
| $\chi^2=7.187$ , p=0.066                           |      |      |      |      |       |
| <b>CRD</b>                                         |      |      |      |      |       |
| Count                                              | 5    | 8    | 2    | 4    | 18    |
| Percentage in each group                           | 27.8 | 44.4 | 11.1 | 16.7 | 100   |
| Percentage within each severity group              | 17.9 | 16.7 | 6.3  | 21.1 |       |
| $\chi^2=2.225$ , p=0.522                           |      |      |      |      |       |
| <b>Anemia</b>                                      |      |      |      |      |       |
| Count                                              | 0    | 4    | 0    | 0    | 4     |
| Percentage in each group                           | 0    | 100  | 0    | 0    | 100   |
| Percentage within each severity group              | 0    | 8.3  | 0    | 0    |       |
| $\chi^2=6.797$ , p=0.079                           |      |      |      |      |       |
| <b>Hypocoagulation</b>                             |      |      |      |      |       |
| Count                                              | 1    | 8    | 2    | 0    | 11    |
| Percentage in each group                           | 9.1  | 72.7 | 18.2 | 0    | 100   |
| Percentage within each severity group              | 3.6  | 16.7 | 6.3  | 0    |       |
| $\chi^2=6.842$ , p=0.077                           |      |      |      |      |       |

$\chi^2$ : Pearson Chi-Square, p: Asymptotic significance (two-sided)
